# Supplementary material for: Characterisation and functional predictions of canine long non-coding RNAs
Source: PubMed Central journal article supplement (PMC6128939; doi:10.1038/s41598-018-31770-2), 2018-09-07
Supplement: 41598_2018_31770_MOESM1_ESM.pdf [file 41598_2018_31770_MOESM1_ESM.pdf]

# Characterization and functional predictions of canine long non-coding RNAs

Céline Le Béguec<sup>1</sup>, Valentin Wucher<sup>1,2</sup>, Lætitia Lagoutte<sup>1,3</sup>, Edouard Cadieu<sup>1</sup>, Nadine Botherel<sup>1</sup>, Benoît Hédan<sup>1</sup>, Clotilde De Brito<sup>1</sup>, Anne-Sophie Guillory<sup>1</sup>, Catherine André<sup>1</sup>, Thomas Derrien<sup>1,\*</sup>, and Christophe Hitte<sup>1,\*</sup>

\* Corresponding authors: [hitte@univ-rennes1.fr](mailto:hitte@univ-rennes1.fr); [tderrien@univ-rennes1.fr](mailto:tderrien@univ-rennes1.fr)

| Organ         | Dog breed                | Total reads | Data origin            | Anatomical systems     |
|---------------|--------------------------|-------------|------------------------|------------------------|
| Adrenal_gland | Bernese Mountain Dog     | 54,776,586  | (Wucher et al. 2017)   | Unmapped               |
| Blood         | Beagle                   | 25,294,750  | (Hoepfner et al. 2014) | Unmapped               |
| Brain         | Beagle                   | 39,268,738  | (Hoepfner et al. 2014) | Nervous system         |
| Cerebellum    | Great Swiss Mountain Dog | 44,902,865  | (Wucher et al. 2017)   | Nervous system         |
| Cortex        | Belgian Shepherd         | 41,319,413  | (Wucher et al. 2017)   | Nervous system         |
| Gut_colon     | Bernese Mountain Dog     | 52,310,396  | (Wucher et al. 2017)   | Digestive system       |
| Hair_follicle | Labrador                 | 45,694,722  | (Wucher et al. 2017)   | Integumental system    |
| Heart         | Beagle                   | 24,930,702  | (Hoepfner et al. 2014) | Musculoskeletal system |
| Jejunum       | Labrador                 | 50,569,866  | (Wucher et al. 2017)   | Digestive system       |
| Keratinocyte  | Beagle                   | 54,482,221  | (Hoepfner et al. 2014) | Integumental system    |
| Kidney        | Beagle                   | 27,691,951  | (Hoepfner et al. 2014) | Unmapped               |
| Liver         | Beagle                   | 25,010,943  | (Hoepfner et al. 2014) | Unmapped               |
| Lung          | Beagle                   | 22,278,693  | (Hoepfner et al. 2014) | Unmapped               |
| Mammary_gland | Great Swiss Mountain Dog | 44,349,725  | (Wucher et al. 2017)   | Integumental system    |
| Mucosal       | Labrador                 | 44,195,944  | (Wucher et al. 2017)   | Integumental system    |
| Muscle        | Beagle                   | 24,808,375  | (Hoepfner et al. 2014) | Musculoskeletal system |

|                |                          |            |                        |                     |
|----------------|--------------------------|------------|------------------------|---------------------|
| Nasal_planum   | Labrador                 | 69,193,538 | (Wucher et al. 2017)   | Integumental system |
| Olfactory_bulb | Great Swiss Mountain Dog | 45,799,491 | (Wucher et al. 2017)   | Nervous system      |
| Ovary          | Beagle                   | 69,193,538 | (Hoeppner et al. 2014) | Unmapped            |
| Pancreas       | Belgian Shepherd         | 47,171,936 | (Wucher et al. 2017)   | Unmapped            |
| Retina         | Border Collie            | 50,480,134 | (Wucher et al. 2017)   | Unmapped            |
| Skin           | Beagle                   | 52,275,710 | (Wucher et al. 2017)   | Integumental system |
| Spinal_cord    | Great Swiss Mountain Dog | 46,844,306 | (Wucher et al. 2017)   | Nervous system      |
| Spleen         | Belgian Shepherd         | 49,604,583 | (Wucher et al. 2017)   | Unmapped            |
| Testis         | Beagle                   | 26,743,805 | (Hoeppner et al. 2014) | Testis              |
| Thymus         | Saluki                   | 51,079,197 | (Wucher et al. 2017)   | Unmapped            |

**Supplementary Table S1.** Description of each tissue type, dog breed, number of total reads, publication reference and anatomical systems.

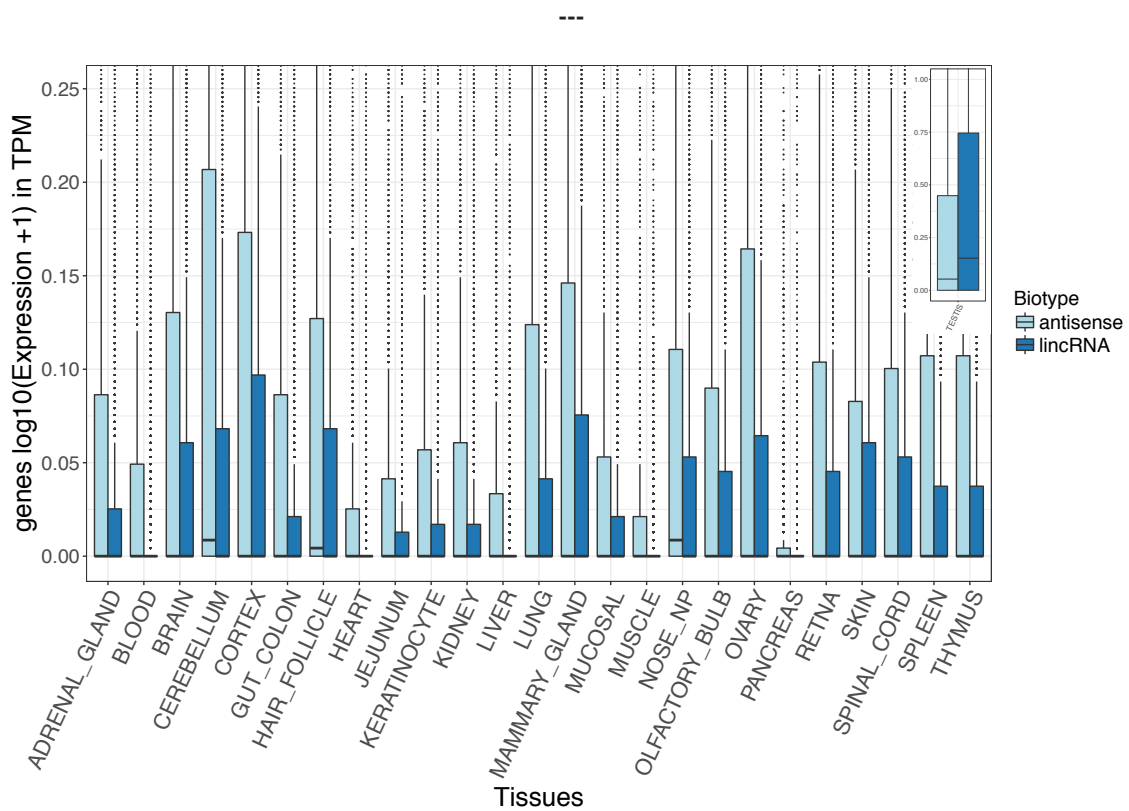

**Supplementary Fig. S1.** Comparative analysis of log<sub>10</sub> transcription (TPM + 1) levels between lincRNAs overlapping an antisense of mRNAs (*antisense*) in light blue and long intergenic non-coding RNAs (lincRNAs) in dark blue genes in 26 canine tissues. Given the high proportion of genes specifically expressed in the testis tissue, it is represented in the box at the top-right of the figure.

---

| Number of gene | %    | Tissues       | Number of gene | %   | Tissues        |
|----------------|------|---------------|----------------|-----|----------------|
| 3,001          | 65.3 | Testis        | 47             | 1.0 | Keratinocyte   |
| 156            | 3.4  | Cerebellum    | 45             | 1.0 | Blood          |
| 138            | 3.0  | Thymus        | 44             | 1.0 | Olfactory_bulb |
| 132            | 2.9  | Kidney        | 43             | 0.9 | Spleen         |
| 118            | 2.6  | Hair_follicle | 40             | 0.9 | Jejunum        |
| 104            | 2.3  | Liver         | 37             | 0.8 | Retina         |
| 97             | 2.1  | Ovary         | 34             | 0.7 | Muscle         |
| 90             | 2.0  | Adrenal_gland | 34             | 0.7 | Brain          |
| 74             | 1.6  | Nasal_planum  | 32             | 0.7 | Skin           |
| 60             | 1.3  | Cortex        | 31             | 0.7 | Spinal_cord    |
| 59             | 1.3  | Heart         | 30             | 0.7 | Mammary_gland  |
| 58             | 1.3  | Lung          | 24             | 0.5 | Pancreas       |
| 53             | 1.2  | Gut_colon     | 18             | 0.4 | Mucosal        |

**Supplementary Table S2.** First column is the number of tissue specific lncRNAs per tissue. Second column is the percentage versus the total number of 4,599 tissue specific lncRNAs. Third column is the tissue.

---

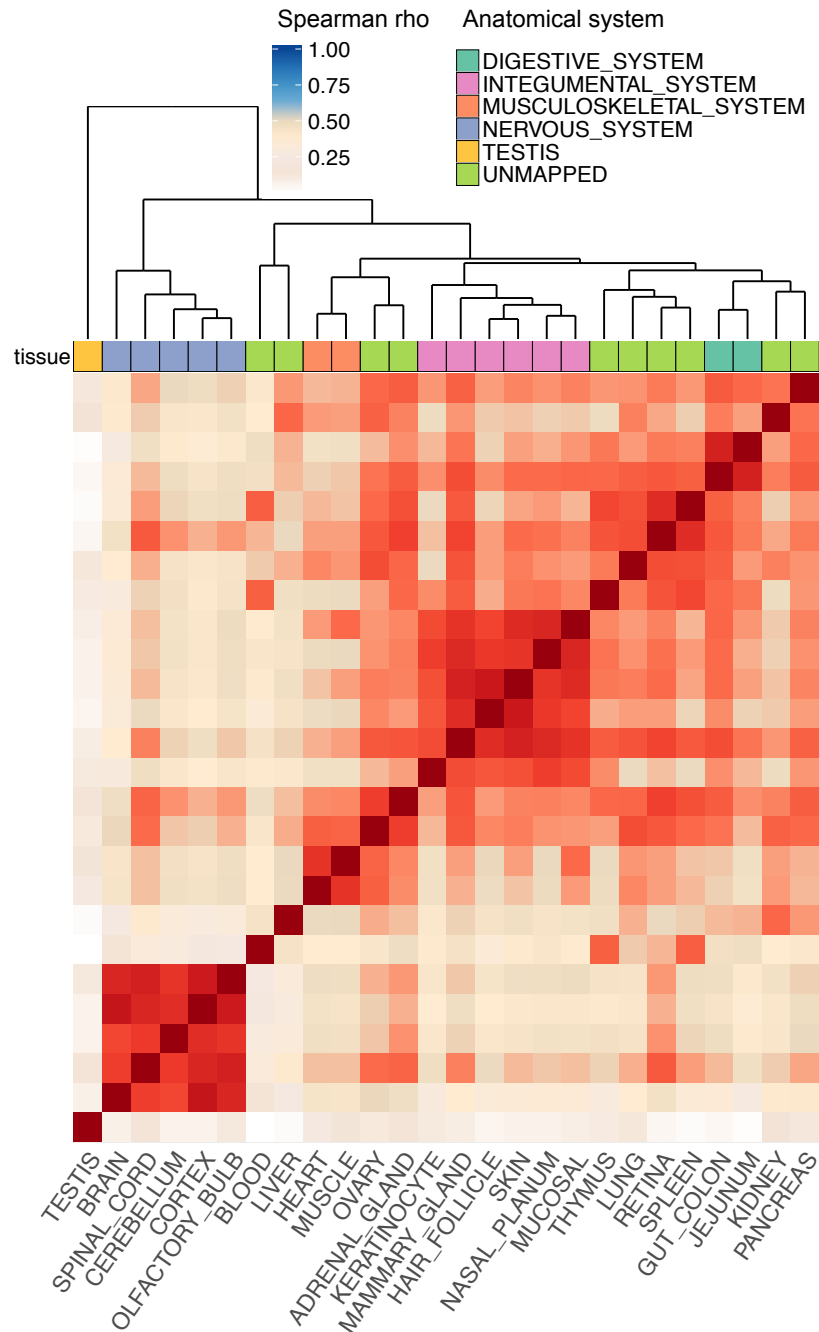

**Supplementary Fig. S2.** Hierarchical clustering of the 26 canine tissues based on Spearman correlations (Correlation coefficient) measured from protein-coding genes expression data (normalized in TPM).

---

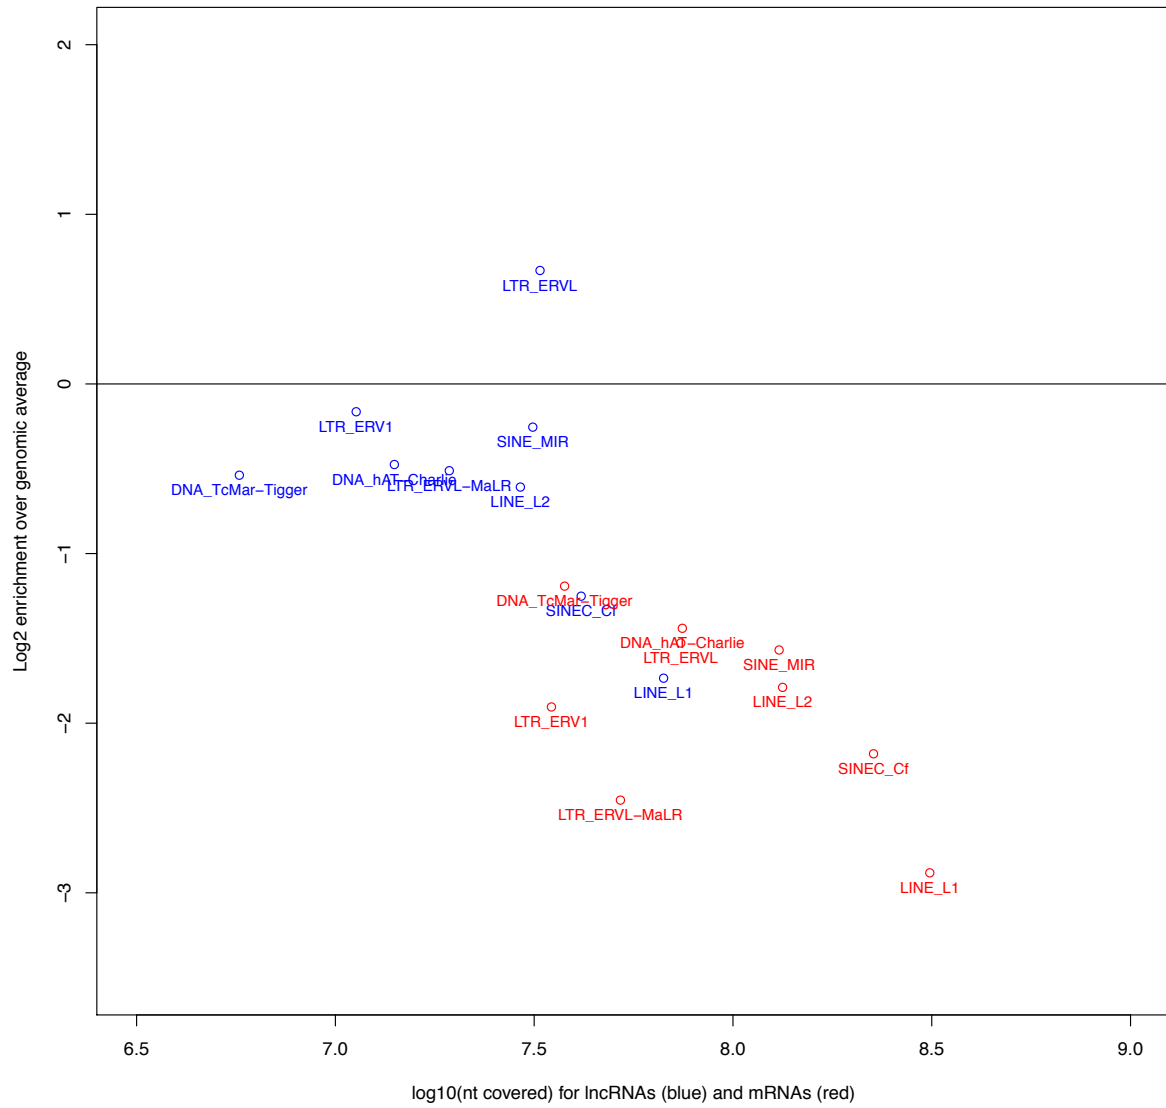

**Supplementary Fig. S3.** TE family frequencies for lincRNAs (blue) versus mRNAs (red) compared to the genomic average. Larger families are on the right. Enrichments are above zero on the y-axis whereas depletions are below zero.

---

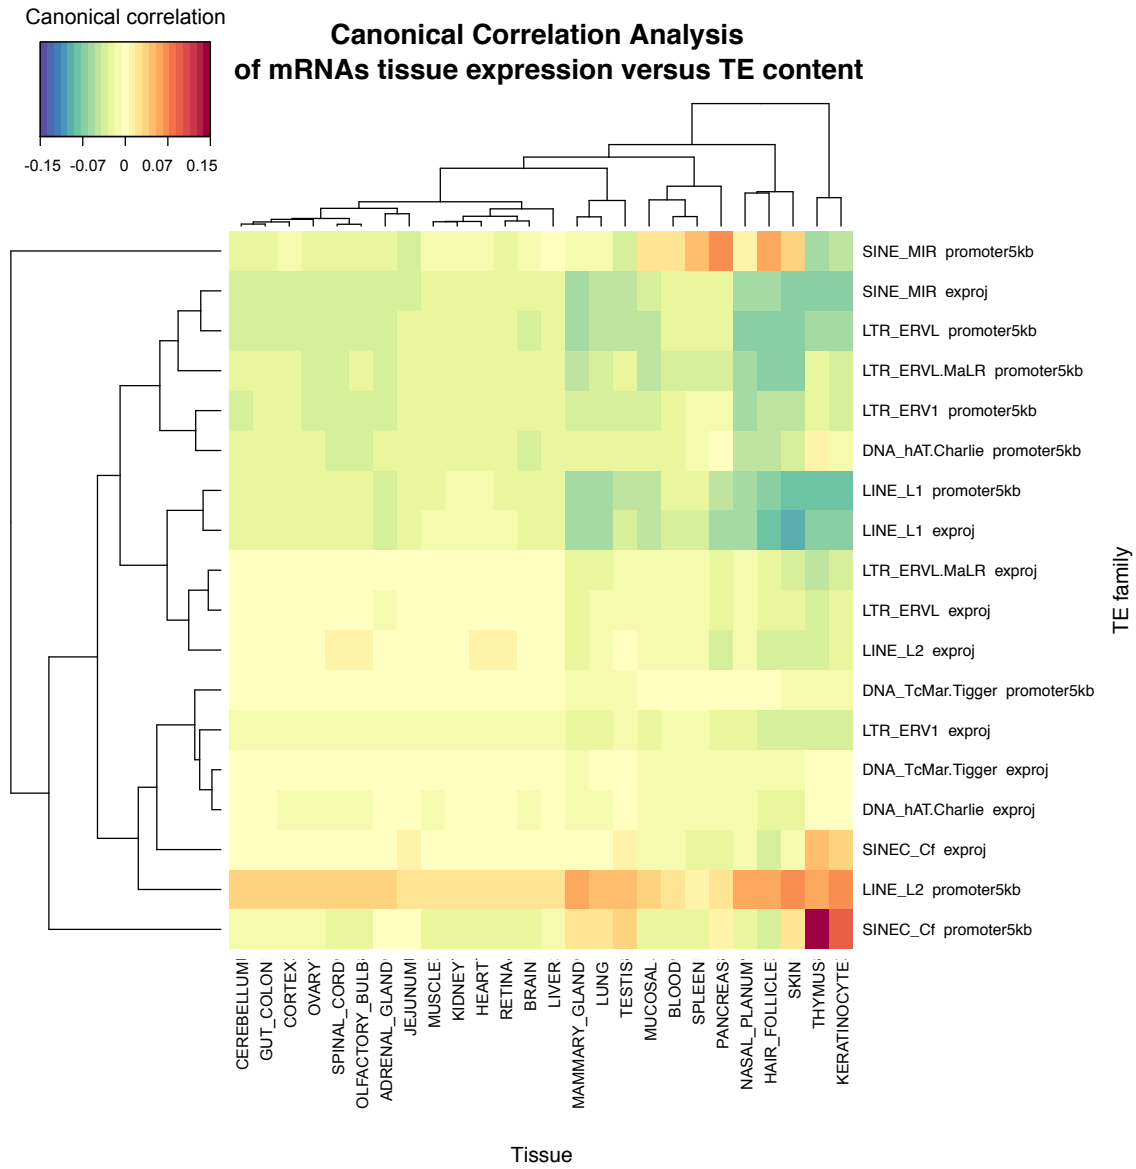

**Supplementary Fig. S4.** Canonical correlations between mRNAs expression in the 26 tissues (column) and TE families in rows in exons and promoters.

---

**Supplementary Fig. S5.** <http://dogs.genouest.org/lncRNA.html> with all circos (from chromosome 2 to X).

---

|       |                    | mRNA  | lncRNA |
|-------|--------------------|-------|--------|
| Dog   | Number of gene     | 8,832 | 939    |
|       | Mean exon per gene | 12.2  | 3.1    |
| Human | Number of gene     | 8,832 | 939    |
|       | Mean exon per gene | 12.7  | 3.6    |

**Supplementary Table S3.** Effective and mean number of exon per gene (for dog and human data).

---

---

### Multiple co-expression patterns

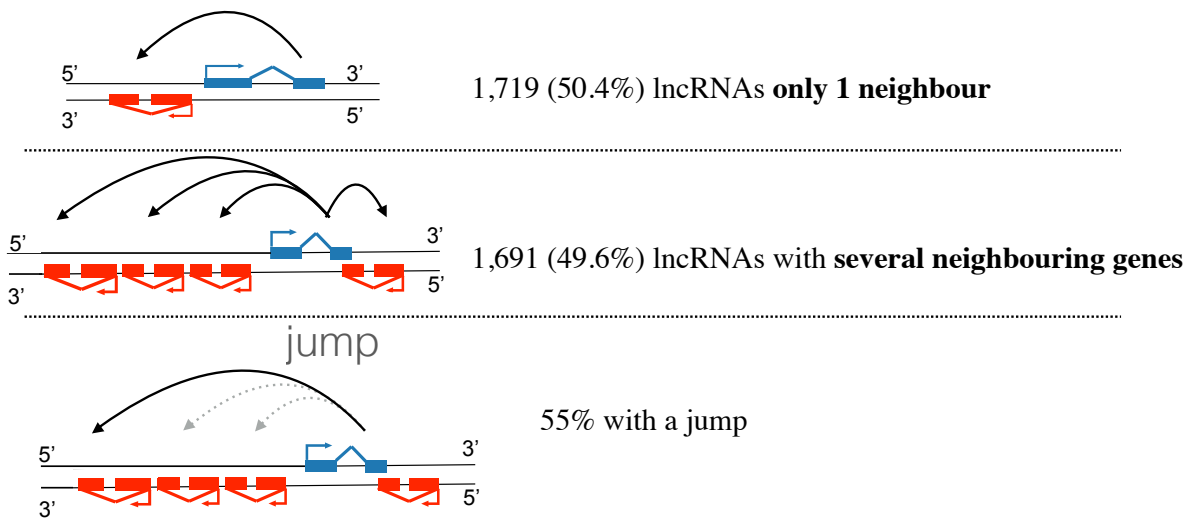

Supplementary Fig. S7. Schema representing multiple co-expression patterns, with only 1 neighbour, several neighbouring genes and a jump.

---

### lncRNA:mRNA co-expressed pairs

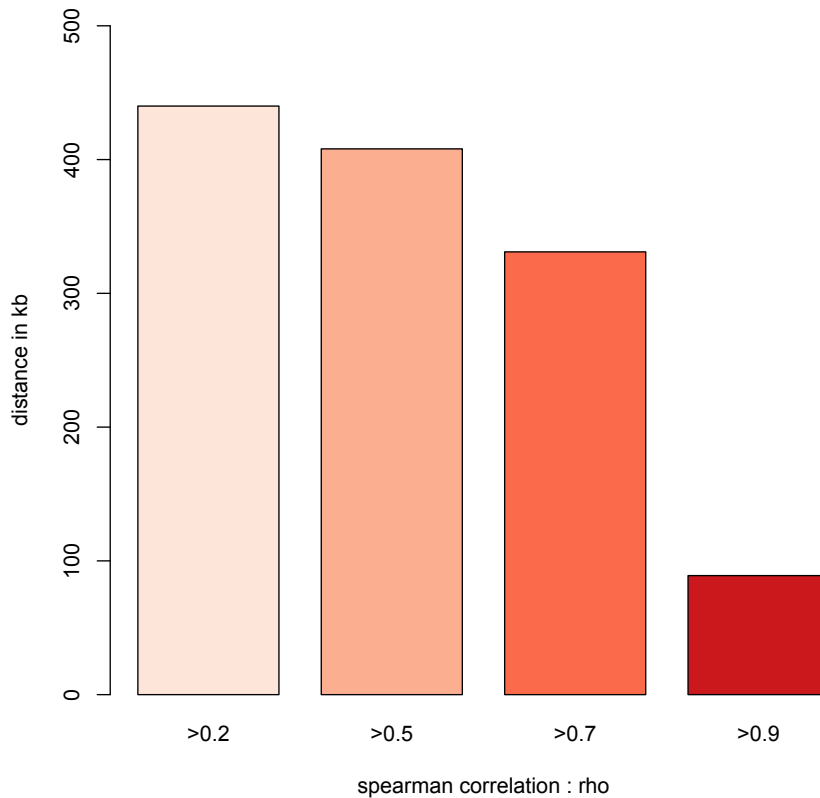

Supplementary Fig. S8. lncRNA:mRNA co-expression Spearman rho values from > 0.2 to > 0.9 as a function of the distance between lncRNA and mRNA.

---

| GO terms   | Description                                          | FDR                | Nb of genes |
|------------|------------------------------------------------------|--------------------|-------------|
| GO:0007423 | Sensory organ development                            | 0.6 <sup>e-3</sup> | 147         |
| GO:0007389 | Pattern specification process                        | 0.7 <sup>e-3</sup> | 127         |
| GO:0048736 | Appendage development                                | 4.1 <sup>e-3</sup> | 58          |
| GO:0048089 | Positive regulation of cellular component biogenesis | 4.1 <sup>e-3</sup> | 129         |
| GO:0061564 | Axon development                                     | 5.1 <sup>e-3</sup> | 129         |
| GO:0018205 | Peptidyl lysine modification                         | 5.1 <sup>e-3</sup> | 115         |
| GO:0051961 | Negative regulation of nervous system development    | 6.7 <sup>e-3</sup> | 81          |
| GO:0030902 | Hinbrain development                                 | 6.7 <sup>e-3</sup> | 49          |
| GO:0010975 | Regulation of neuron projection development          | 7.5 <sup>e-3</sup> | 116         |
| GO:0048568 | Embryonic organ development                          | 8.9 <sup>e-3</sup> | 118         |
| GO:0050804 | Modulation of synaptic transmission                  | 8.9 <sup>e-3</sup> | 84          |
| GO:0016049 | Cell growth                                          | 1.1 <sup>e-2</sup> | 135         |
| GO:0007033 | Vacuole organization                                 | 1.1 <sup>e-2</sup> | 54          |
| GO:0016570 | Histone modification                                 | 1.1 <sup>e-2</sup> | 120         |
| GO:0060021 | Palate development                                   | 1.2 <sup>e-2</sup> | 32          |
| GO:0060560 | Developmental growth involved in morphogenesis       | 1.7 <sup>e-2</sup> | 65          |
| GO:0051962 | Positive regulation of nervous system development    | 1.9 <sup>e-2</sup> | 121         |
| GO:0001701 | In utero embryonic development                       | 2.0 <sup>e-2</sup> | 92          |
| GO:0022604 | Regulation of cell morphogenesis                     | 2.2 <sup>e-2</sup> | 118         |
| GO:0016358 | Dendrite development                                 | 2.4 <sup>e-2</sup> | 58          |
| GO:0007224 | Smoothened signaling pathway                         | 3.5 <sup>e-2</sup> | 40          |
| GO:0010720 | Positive regulation of cell development              | 4.0 <sup>e-2</sup> | 118         |

**Supplementary Table S4.** Enrichment analysis of mRNA GO terms significantly co-expressed in 8,139 lncRNA:mRNA pairs using the WebGestalt website ([www.webgestalt.org](http://www.webgestalt.org)). GO terms are ranked according to their FDR together with the number of genes presenting the specific GO term.

---



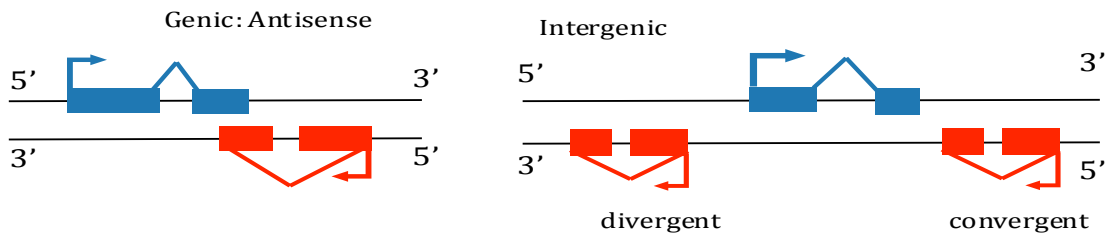

**Supplementary Fig. S9.** Schema representing *antisense* and *lincRNA* (divergent and convergent).
